# Supplementary material for: A supramolecular approach to multivalent target-specific MRI contrast agents for angiogenesis
Source: Royal Society of Chemistry journal article supplement (doi:10.1039/b502347e), 2005-01-01
Supplement: b502347e.pdf [file b502347e.pdf]

## Supporting Information

### A Supramolecular Approach to Multivalent Target-Specific MRI Contrast

#### Agents for Angiogenesis

Anouk Dirksen,<sup>a</sup> Sander Langereis,<sup>a</sup> Bas F. M. de Waal,<sup>a</sup> Marcel H. P. van Genderen,<sup>a</sup> Tilman M.

Hackeng,<sup>\*b</sup> and E. W. Meijer<sup>\*a</sup>

<sup>a</sup> Laboratory of Macromolecular and Organic Chemistry, Eindhoven University of Technology, P.O. Box 513, 5600 MB Eindhoven, The Netherlands. Fax: +31 (0)40 2451036; Tel: +31 (0)40 2473101; E-mail: E.W.Meijer@tue.nl

<sup>b</sup> Cardiovascular Research Institute Maastricht (CARIM), University Maastricht, P.O. Box 616, 6200 MD Maastricht, the Netherlands. Fax: +31 (0)43 3884159; Tel: +31 (0)43 3881538; E-mail: T.Hackeng@bioch.unimaas.nl

# Supplementary Material (ESI) for Chemical Communications

# This journal is © The Royal Society of Chemistry 2005

**Solvents and Starting Materials.** Unless stated otherwise, all reagents and solvents were purchased from commercial sources and used without any further purification.

**Instrumentation.** Reversed phase high pressure liquid chromatography (RP HPLC) was performed on a Varian Pro Star HPLC system coupled to an UV-Vis detector probing at 214 nm using a Vydac™ protein & peptide C18 column. Electrospray ionization mass spectrometry (ESI-MS) was performed on a Perkin Elmer PE SCIEX Turbo Ionspray. The longitudinal ionic relaxivity ( $r_1$ ) was determined by a concentration dependent measurement of the longitudinal relaxation time ( $T_1$ ) via an inversion recovery pulse sequence at 1.5 T and 20 °C on a Philips Gyroscan S15/ACS. The gadolinium content was determined by means of inductively coupled plasma atomic emission spectroscopy (ICP-AES) on a Leeman Labs Echelle spectrometer.

### **Synthesis:**

**AcC(SAcM)NGRC(SAcM)GGMPAL (1).** The peptide containing the target-specific NGR sequence with a thioester at its C-terminal was synthesized as previously reported.<sup>1</sup>

**C-Biotin (2).** C-Biotin was synthesized according to a literature procedure.<sup>2</sup>

**AcC(SAcM)NGRC(SAcM)GGC-Biotin (3).** 59.4 mg (0.057 mmol) of **1** and 1.1 equivalent (24.6 mg, 0.066 mmol) of **2** were dissolved in 1 mL of 6 M Guanidine in 0.07 M Tris (aq). To this solution 20 μL (2 v-%) of thiophenol and 20 μL (2 v-%) of benzylmercaptan were added. The pH was adjusted to pH ~7 by the addition of small aliquots of 0.5 M NaOH (aq). The reaction was continued for 2 hours at 37 °C. The reaction mixture was filtered and the product was purified employing preparative RP HPLC over a C18 column (gradient: 7–27% MeCN in H<sub>2</sub>O, 0.1% TFA in 90 minutes). Freeze drying rendered 57.6 mg (0.047 mmol, 83%) of **3** as a fluffy white powder: ESI-MS calcd. for C<sub>45</sub>H<sub>76</sub>N<sub>18</sub>O<sub>14</sub>S<sub>4</sub> ([M+H]<sup>+</sup>): 1221.5, found 1221.3.

**malDTPA (4).** The synthesis of **4** will be published elsewhere.

# Supplementary Material (ESI) for Chemical Communications

# This journal is © The Royal Society of Chemistry 2005

**AcC(SAcm)NGRC(SAcm)GGC(S-DTPA)-Biotin (5).** 45.0 mg (0.0369 mmol) of **3** was dissolved in 1 mL 0.1 M Tris (aq, pH 6.9). The solution was added to 24.5 mg (0.0369 mmol) of **4**. The pH of the solution was adjusted to pH 6.5 by the addition of small aliquots of 0.5 M NaOH (aq) and the reaction was continued for 2 hours at room temperature. The reaction was monitored employing analytical RP HPLC over a C18 column (gradient: 0–67% MeCN in H<sub>2</sub>O, 0.1% TFA in 30 minutes) and showed that the reaction went to completion. The reaction mixture was used for the next reaction step without any purification. ESI-MS calcd. for C<sub>74</sub>H<sub>113</sub>N<sub>23</sub>O<sub>27</sub>S<sub>4</sub> ([M+H]<sup>+</sup>): 1884.7, found 1885.0.

**Ac-cNGR-GGC(S-DTPA)-Biotin (6).** The reaction mixture was diluted ~ 30 times by adding 40.5 mL of 0.1 M Tris (aq, pH 6.9) and 4.5 mL (*i. e.* 10 v-%) of acetic acid. Subsequently, 870 µL of a 0.075 M solution of I<sub>2</sub> in MeOH (0.064 mmol of I<sub>2</sub>, 1.75 equivalents) were added and the reaction was continued for 1 hour at room temperature. The product was purified employing preparative RP HPLC over a C18 column (gradient: 10–30% MeCN in H<sub>2</sub>O, 0.1% TFA in 90 minutes). Freeze drying rendered 17.2 mg (9.9 µmol, 27%) of **6** as a fluffy white powder. ESI-MS calcd. for C<sub>68</sub>H<sub>101</sub>N<sub>21</sub>O<sub>25</sub>S<sub>4</sub> ([M+H]<sup>+</sup>): 1740.6, found 1740.9.

**HPLC traces of 4, 5, and 6 (analytical RP HPLC; gradient: 0–33.5% MeCN in H<sub>2</sub>O, 0.1% TFA in 15 minutes):**

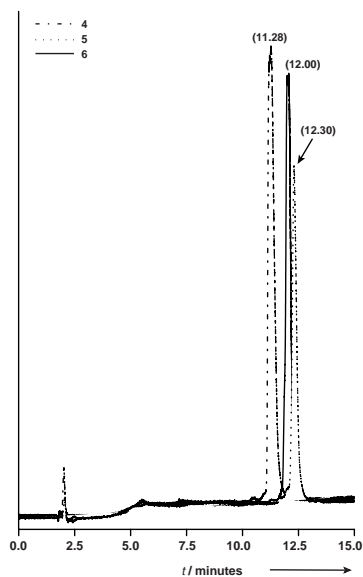

**Ac-cNGR-GGC(S-Gd(III)DTPA)-Biotin (7).** 14.6 mg (8.4  $\mu\text{mol}$ ) of **6** was dissolved in 5 mL of  $\text{H}_2\text{O}$ . The pH was adjusted to pH 7 by adding small aliquots of 0.5%  $\text{NH}_4\text{OH}$  (aq). To this solution was added 0.5 mL of a 16.8 mM solution  $\text{GdCl}_3$  in  $\text{H}_2\text{O}$  (8.4  $\mu\text{mol}$ ). This was done in a stepwise manner and followed with ESI-MS to ensure full complexation, avoiding the addition of an excess of  $\text{GdCl}_3$ . Freeze drying rendered **7** in quantitative yield (> 99%). ESI-MS calcd. for  $\text{C}_{68}\text{H}_{98}\text{GdN}_{21}\text{O}_{25}\text{S}_4$  ( $[\text{M}-\text{H}]^-$ ): 1893.5, found 1893.8. ICP-AES gadolinium content: 81%.

**ESI-MS spectrum of 7 (negative mode):**

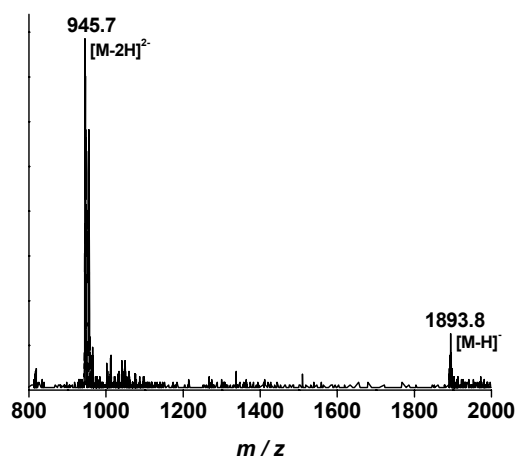

# Supplementary Material (ESI) for Chemical Communications

# This journal is © The Royal Society of Chemistry 2005

**Longitudinal relaxivity measurement ( $r_1$ ) of 7.** For the relaxivity measurements a dilution series of **7** was prepared in PBS buffer (pH 7.4): 1.6 mM, 1.2 mM, 0.8 mM, 0.4 mM, 0.08 mM. Each sample had a volume of 0.5 mL. For each concentration the longitudinal relaxation time  $T_1$  was determined, giving a good linear fit ( $R^2 > 0.999$ ) to the equation  $(1/T_1)_{\text{observed}} = (1/T_1)_{\text{diamagnetic}} + r_1[\text{Gd(III)}]$ . The  $r_1$  was calculated in terms of the actual Gd(III) content as determined with ICP-AES.

### Longitudinal relaxivity ( $r_1$ ) measurement of 7:

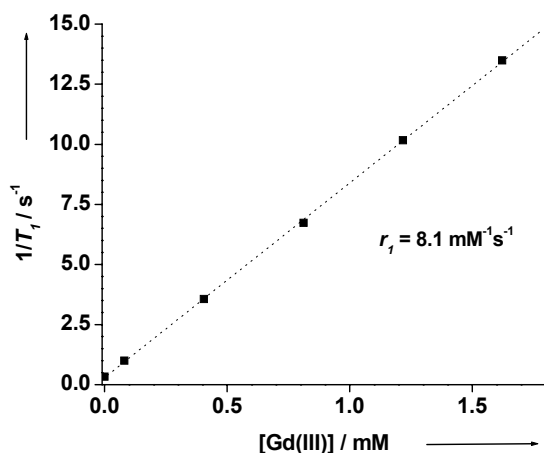

### Binding studies of 7 with avidin:

**HABA assay.**<sup>3</sup> 166  $\mu\text{L}$  of a 30  $\mu\text{M}$  solution of avidin (from egg-white) in PBS buffer (pH 7.4), 20  $\mu\text{L}$  of a 5 mM solution of 4'-hydroxyazobenzene-2-carboxylic acid (HABA), and 314  $\mu\text{L}$  of PBS buffer (pH 7.4) were mixed in a quartz cuvette ( $l = 1$  cm). To this solution was added in aliquots of 10  $\mu\text{L}$  a 0.26 mM solution of 7. The absorption was probed at 500 nm, which is in the absorption maximum of HABA bound to avidin.

**Longitudinal relaxivity ( $r_1$ ) measurements: effects of the binding to avidin.** To 0.5 mL of a 0.08 mM solution of 7 in PBS buffer (pH 7.4) was added stepwise in aliquots of 25  $\mu\text{L}$  a 0.12 mM solution of avidin (from egg-white) in PBS buffer (pH 7.4). The  $T_1$  was measured after each addition.

1. A. Dirksen, S. Langereis, B. F. M. de Waal, M. H. P. van Genderen, E. W. Meijer, Q. G. de Lussanet, T. M. Hackeng, *Org. Lett.* 2004, **6**, 4857-4860.
2. J. T. Tolbert; C.-H. Wong, *J. Am. Chem. Soc.*, 2000, **122**, 5421-5428.
3. N. M. Green, *Biochem. J.*, 1965, **94**, 23c-24c.
